# Supplementary material for: Factors Associated with Acute Kidney Injury Occurrence and Prognosis in Rhabdomyolysis at the Emergency Department
Source: MDPI journal article supplement (doi:10.3390/medicina60010105), 2024-01-05
Supplement: s1 [file s1]

## Supplementary Information

Supplementary Table S1

Grouping criteria according to the final diagnosis

| Simple rhabdomyolysis | Complex rhabdomyolysis         |
|-----------------------|--------------------------------|
| Drug-induced          | Pulmonary infection            |
| Exercise              | Urinary infection              |
| Burn                  | Meningitis                     |
| Heat stroke           | Gastrointestinal infection     |
| Hypothermia           | Otorhinolaryngologic infection |
| Trauma                | Skin infection                 |
| Bite                  | Viral infection                |
| CO intoxication       | Unknown infection              |
|                       | Cancer                         |
|                       | Neuromuscular disease          |
|                       | Endocrinological disease       |
|                       | Cardiovascular disease         |
|                       | Neuropsychiatric disease       |
|                       | Kidney disease                 |
|                       | Myositis                       |
|                       | Compartment syndrome           |
|                       | Unknown etiology               |

Supplementary Table S2

Clinical and laboratory characteristics of patients within all groups

| Serum CPK, U/L      | Patients without AKI<br>(n= 293) | Patients with AKI<br>(n = 115) | P-value | Patients with simple<br>rhabdomyolysis<br>(n = 267) | Patients with complex<br>rhabdomyolysis<br>(n = 141) | P-value | Patients<br>infection<br>(n = 342) | without<br>(n = 66) | Patients with infection<br>(n = 66) | P-<br>value |
|---------------------|----------------------------------|--------------------------------|---------|-----------------------------------------------------|------------------------------------------------------|---------|------------------------------------|---------------------|-------------------------------------|-------------|
| Initial CPK (Day 1) | 26,866 (2,363)                   | 13,074 (2,667)                 | <0.001  | 29,908 (2,694)                                      | 9,856 (1,316)                                        | <0.001  | 25,814 (2,194)                     |                     | 8,282 (1,397)                       | <0.001      |
| Day 2               | 24,644 (2,567)                   | 15,401 (4,121)                 | 0.001   | 25,921 (2,942)                                      | 14,499 (2,901)                                       | 0.002   | 24,803 (2,571)                     |                     | 7,479 (1,202)                       | <0.001      |
| Day 3               | 22,412 (2,828)                   | 12,879 (3,439)                 | 0.007   | 21,633 (2,809)                                      | 15,826 (3,810)                                       | 0.120   | 21,898 (2,583)                     |                     | 5,999 (1,030)                       | 0.002       |
| Day 4               | 16,345 (2,327)                   | 10,988 (3,137)                 | 0.158   | 16,212 (2,293)                                      | 12,636 (3,464)                                       | 0.087   | 16,463 (2,160)                     |                     | 4,814 (977)                         | 0.009       |
| Day 5               | 11,308 (2,092)                   | 8,160 (2,438)                  | 0.485   | 10,301 (1,744)                                      | 10,797 (3,483)                                       | 0.836   | 11,376 (1,883)                     |                     | 4,079 (833)                         | 0.066       |
| Day 6               | 8,674 (2,563)                    | 6,373 (2,336)                  | 0.735   | 7,382 (1,589)                                       | 9,067 (4,489)                                        | 0.515   | 8,878 (2,216)                      |                     | 2,245 (424)                         | 0.130       |
| Day 7               | 4,366 (1,000)                    | 4,265 (1,466)                  | 0.879   | 4,020 (966)                                         | 4,991 (1,567)                                        | 0.289   | 4,723 (934)                        |                     | 1,788 (413)                         | 0.579       |

Mean (±standard deviation)

Supplementary Table S3

Sensitivity, specificity, and area under the curve (AUC) of the predictive model for AKI based on receiver operating characteristic curve analysis

| Variable    | Sensitivity | Specificity | Youden index | AUC (95% CI)     | P-value |
|-------------|-------------|-------------|--------------|------------------|---------|
| Age, years  | 0.826       | 0.553       | 0.379        | .703 (0.65–0.76) | <0.001  |
| Creatinine  | 0.870       | 0.840       | 0.709        | .887 (0.85–0.92) | <0.001  |
| Potassium   | 0.417       | 0.911       | 0.329        | .614 (0.54–0.68) | <0.001  |
| Lactate     | 0.583       | 0.792       | 0.374        | .684 (0.62–0.75) | <0.001  |
| Initial CPK | 0.913       | 0.102       | 0.015        | .386 (0.33–0.44) | <0.001  |

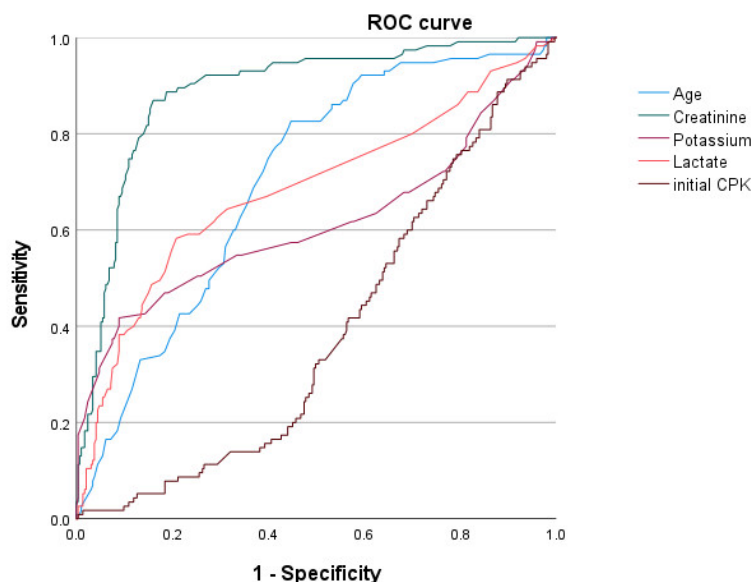

Supplementary Figure S1. ROC curve of significant variables in the multivariable logistic regression
